# Supplementary material for: PDGF-BB/SA/Dex injectable hydrogels accelerate BMSC-mediated functional full thickness skin wound repair by promoting angiogenesis
Source: Royal Society of Chemistry journal article supplement (doi:10.1039/d1tb00952d), 2021-01-01
Supplement: d1tb00952d1.pdf [file d1tb00952d1.pdf]

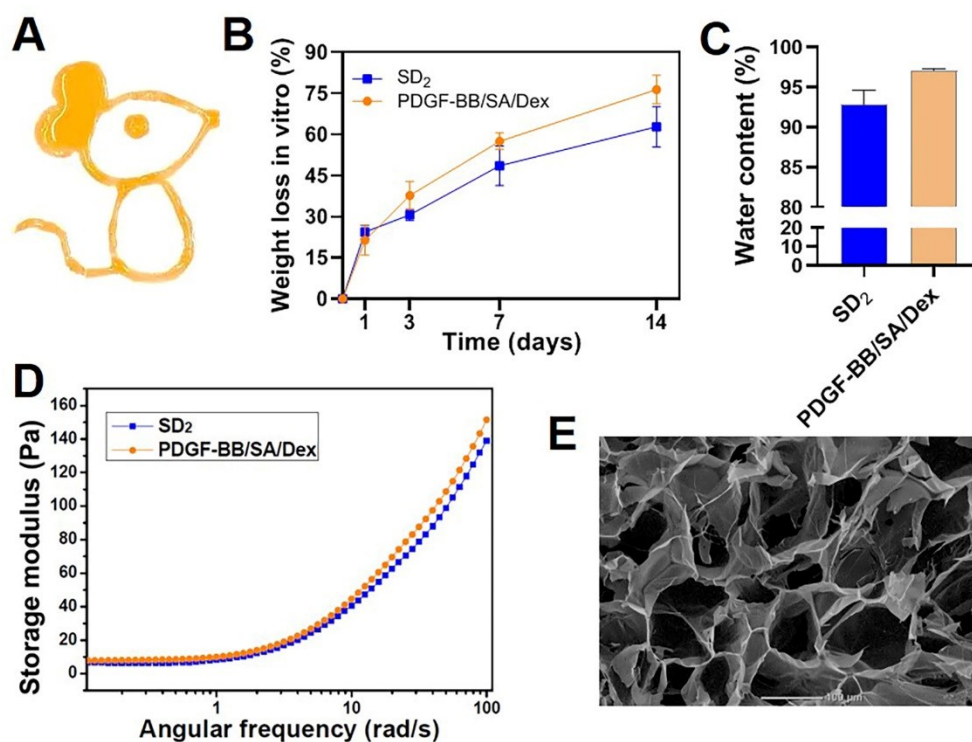

**Fig.S1** Preparation and characterization of PDGF-BB/SA/Dex hydrogel. (A) The injectability of PDGF-BB/SA/Dex hydrogel through the needle; Weight loss in vitro (B), water content (C), storage modulus (D), and SEM image (E) of PDGF-BB/SA/Dex hydrogel. Scale bar=100 μm.
